# Supplementary material for: Enhanced Humoral Immune Responses against Toxin A and B of Clostridium difficile is Associated with a Milder Disease Manifestation
Source: PubMed Central journal article supplement (PMC7601293; doi:10.3390/jcm9103241), 2020-10-10
Supplement: jcm-09-03241-s001.pdf [file jcm-09-03241-s001.pdf]

**Table S1.** Demographic and selected clinical characteristics of cases and control of the original study and the sub-sample included in the current study.

| <b>Variable</b>                                                           | <b>All cases, <i>n</i><br/>= 140</b> | <b>Sub-sample of<br/>cases, <i>n</i> = 50</b> | <b>All controls, <i>n</i><br/>= 140</b> | <b>Sub-sample of<br/>controls, <i>n</i> = 52</b> |
|---------------------------------------------------------------------------|--------------------------------------|-----------------------------------------------|-----------------------------------------|--------------------------------------------------|
| Age, years, Mean (SD)                                                     | 78.8 (15.4)                          | 79.2 (13.7)                                   | 81.4 (7.5)                              | 82.7 (7.6)                                       |
| Sex (Female), <i>n</i> (%)                                                | 88 (63%)                             | 31 (62%)                                      | 86 (61%)                                | 29 (56%)                                         |
| Visit to emergency department in the<br>previous year (Yes), <i>n</i> (%) | 36 (31%)                             | 12 (24%)                                      | 43 (31%)                                | 20 (39%)                                         |
| Antibiotic use (Yes), <i>n</i> (%)                                        | 117 (84%)                            | 37 (74%)                                      | 68 (49%)                                | 25 (48%)                                         |
| Use of proton pump inhibitors (Yes), <i>n</i><br>(%)                      | 98 (70%)                             | 31 (62%)                                      | 101 (72%)                               | 37 (71%)                                         |
